# Supplementary material
Source: Springer Nature journal article supplement (https://www.springermedizin.de/resource/supplementary/13054_2010_8377_MOESM1_ESM.pdf/9731828)

### GCS < 13

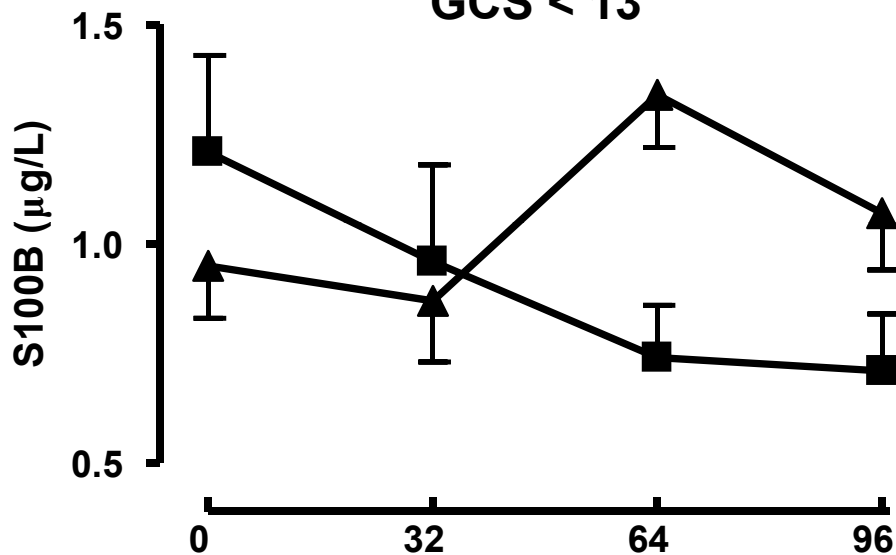

### GCS $\geq$ 13

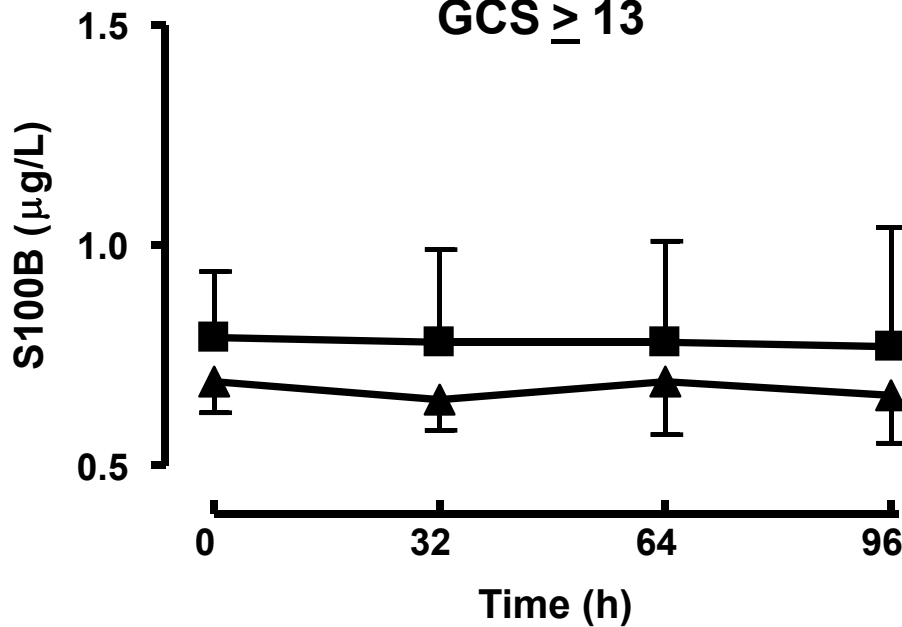

- DrotAA
- ▲ No DrotAA

Supplement: MOESM1 [file 9731828]
